# Supplementary material for: Stimulus-responsive reversible thermochromism and exciplex emission of a Zn(ii) complex and selective sensing of NH3 gas
Source: Royal Society of Chemistry journal article supplement (doi:10.1039/c9dt00764d), 2019-01-01
Supplement: c9dt00764d1.pdf [file c9dt00764d1.pdf]

## Supplementary Information

Stimulus-responsive reversible thermochromism and exciplex emission of a Zn(II) complex and  
selective sensing of NH<sub>3</sub> gas

Jinling Miao,<sup>\*a</sup> Yong Nie,<sup>\*a</sup> Zhixin Xiong,<sup>a</sup> Yongshuai Chai,<sup>a</sup> Shuqing Fu,<sup>a</sup> Hong Yan<sup>\*b</sup>

<sup>a</sup>School of Chemistry and Chemical Engineering, Institute for Smart Materials & Engineering,  
University of Jinan, 250022 Jinan, P. R. China

<sup>b</sup>State Key Laboratory of Coordination Chemistry, School of Chemistry and  
Chemical Engineering, Nanjing University, 210023 Nanjing, P. R. China

## Contents

|                                                                                                                                                |     |
|------------------------------------------------------------------------------------------------------------------------------------------------|-----|
| Experimental section                                                                                                                           | S2  |
| Figure S1. TG curve of <b>1</b> under an air atmosphere (temperature range 30 - 800°C)                                                         | S3  |
| Figure S2. <sup>1</sup> H-NMR spectrum of <b>1B'</b> , the completely rehydrated form of <b>1B</b> in DMSO- <i>d</i> <sub>6</sub>              | S4  |
| Figure S3. <sup>1</sup> H-NMR spectrum of <b>1A'</b> in DMSO- <i>d</i> <sub>6</sub>                                                            | S4  |
| Figure S4. FT-IR spectra of <b>1</b> , <b>1A'</b> and <b>1B</b>                                                                                | S4  |
| Table S1. The absorption peaks of the COO moieties in <b>1</b> , <b>1A'</b> and <b>1B</b>                                                      | S5  |
| Figure S5. Emission spectra of H <sub>2</sub> MPIDA, dihydrated 4,4'-bipy and anhydrous 4,4'-bipy                                              | S5  |
| Figure S6. Solid state absorption spectra of <b>1</b> and the ligands                                                                          | S5  |
| Figure S7. Fluorescence lifetime profiles of <b>1</b> and the ligands                                                                          | S6  |
| Table S2. Details of the average lifetime analysis of <b>1</b> and the ligands                                                                 | S6  |
| Figure S8. Solid state excitation spectrum of <b>1</b> with emission at 567 nm                                                                 | S7  |
| Equations S1 and S2. Formation of exciplex                                                                                                     | S7  |
| Figure S9. SEM image of <b>1B</b>                                                                                                              | S7  |
| Figure S10. PXRD pattern of <b>1B-NH<sub>3</sub></b>                                                                                           | S7  |
| Figure S11. Emission intensity changes of <b>1B</b> when exposed to NH <sub>3</sub> with time, and repeated cycles (inset) monitored at 570 nm | S8  |
| Figure S12. <sup>1</sup> H-NMR spectrum of <b>1B-NH<sub>3</sub></b> in DMSO- <i>d</i> <sub>6</sub>                                             | S8  |
| Figure S13. <sup>13</sup> C-NMR spectrum of <b>1B-NH<sub>3</sub></b> in DMSO- <i>d</i> <sub>6</sub>                                            | S8  |
| Table S3. Crystal data and structure refinement parameters for <b>1</b>                                                                        | S9  |
| Table S4. Selected bond lengths and angles of <b>1</b>                                                                                         | S10 |

## Experimental section

### Materials

The ligand *N*-(*p*-methylphenyl)iminodiacetic acid (H<sub>2</sub>MPIDA) was prepared by the reaction of *p*-methylaniline with chloroacetic acid under basic condition according to the literature method.<sup>1</sup> All other reagents were commercially purchased and used without further purification.

### Instruments

The elemental analysis was carried out using a Perkin Elmer 2400II Elemental Analyzer. FT-IR spectra (KBr pellets) were recorded on a Perkin Elmer Spectrum RX I spectrometer in the 4000-400 cm<sup>-1</sup> region. NMR spectra were obtained with a Bruker Avance 400 MHz spectrometer. Single-crystal X-ray diffraction measurements were conducted on an Oxford Diffraction Gemini E diffractometer. The structure was solved by direct methods and refined by a full-matrix least-squares technique on *F*<sup>2</sup> using SHELXL-2014 programs.<sup>2</sup> Powder XRD patterns were recorded by using a D8 Focus diffractometer equipped with Cu-K<sub>α</sub> radiation ( $\lambda$  = 1.5406 Å). Thermogravimetric analysis (TGA) was carried out on a Perkin Elmer Diamond TG/DTA Analyzer in an air atmosphere in the temperature range 30 - 800 °C (heating rate 10 °C·min<sup>-1</sup>). Electronic absorption spectra were recorded on a Shimadzu UV-3101PC UV-VIS-NIR Spectrometer. Emission spectra were recorded on an Edinburgh FLS920 spectrometer, using a front-face solid sample configuration. The emission lifetimes were recorded using the time-correlated single-photo-counting method, and the excitation source is an ns flash lamp filled with hydrogen. The SEM picture was taken with an S-2500 machine. ESR spectra were recorded by using an X-band Bruker A300 spectrometer. The frequency of microwaves was 9.86 GHz, the magnetic field was 100 KHz, the center sweeping field was at 3500 G and the modulation amplitude was set as 5 G. The pictures of the color changes of a single crystal were taken with a Leica DM2500 microscope.

### Synthesis of [Zn<sub>2</sub>(MPIDA)<sub>2</sub>(4,4'-bipy)(H<sub>2</sub>O)<sub>4</sub>]·3H<sub>2</sub>O (**1**)

A solution of Zn(NO<sub>3</sub>)<sub>2</sub>·6H<sub>2</sub>O (0.146 g, 0.5 mmol) in 10 mL of water/ethanol (1:1, *V/V*) was added dropwise to a solution of H<sub>2</sub>MPIDA (0.112 g, 0.5 mmol) in 10 mL of water/ethanol (1:1, *V/V*). After stirring for 30 min, 4,4'-bipy (0.078 g, 0.5 mmol) was added to the reaction mixture which was further stirred for 1 h at 80 °C. The resulting mixture was filtered to produce a yellowish filtrate. Colorless crystals (0.088 g, yield 41% based on Zn) of **1** suitable for X-ray diffraction started to grow once the filtrate was cooled to room temperature. Anal. Calcd. for C<sub>32</sub>H<sub>44</sub>Zn<sub>2</sub>N<sub>4</sub>O<sub>15</sub>, C 44.92; H 5.18; N 6.55%. Found: C 44.85; H 5.33; N 6.51%; IR (KBr, cm<sup>-1</sup>): 3401(s), 2928(w), 1610(s), 1515(m), 1397(s), 1293(m), 806(s), 633(m).

**Gas sensing experiments:** ca. 5 mg of **1B** powder was dispersed in 0.1 mL of CH<sub>2</sub>Cl<sub>2</sub>, and drop-cast onto a quartz plate or a piece of filter paper, and the quartz plate/test paper was dried at 50 °C before

use.

The quartz plate was put into a 100-mL Schlenk flask, which was evacuated and ca. 10 mL of gas was injected with a syringe. After ca. 5 min. the quartz plate was taken out and the emission spectrum was measured. In the case of aqueous ammonia, the quartz plate was put into a closed bottle where a few drops of aqueous ammonia were present and the color change of **1B** was observed within 1 min.

In the examination of response time of ammonia, a piece of test paper was put in a capped cuvette and ca. 1 mL of ammonia gas was injected with a syringe and the time-resolved emission spectra were measured immediately after the injection of ammonia.

## References

- 1 a) D. K. Patel, D. Choquesillo-Lazarte, J. M. Gonzalez-Perez; A. Dominguez-Martin, A. Matilla-Hernandez, A. Castineiras and J. Niclos-Gutierrez, *Polyhedron*, 2010, **29**, 683; b) E. Bugella-Altamirano, D. Choquesillo-Lazarte, J. M. Gonzalez-Perez, M. J. Sanchez-Moreno, R. Marin-Sanchez, J. D. Martin-Ramos, B. Covelo, R. Carballo, A. Castineiras, J. Niclos-Gutierrez, *Inorg. Chim. Acta*, 2002, **339**, 160.
- 2 a) G. M. Sheldrick, *Acta Cryst.*, 2015, C71, 3; b) O. V. Dolomanov, L. J. Bourhis, R. J. Gildea, J. A. K. Howard, H. Puschmann, *J. Appl. Crystallogr.*, 2009, **42**, 339.

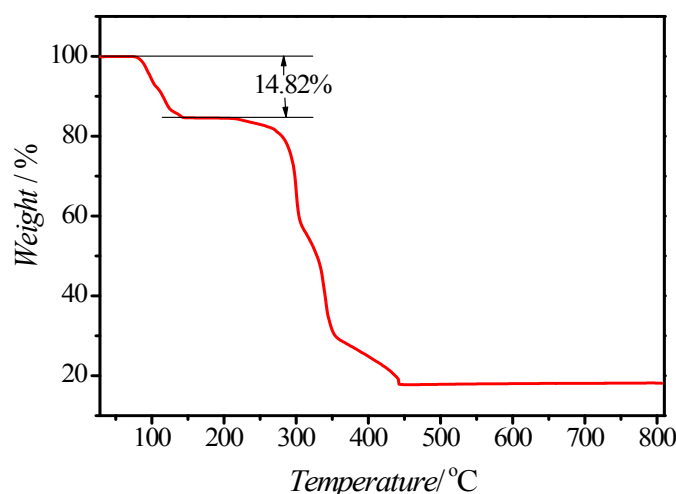

Figure S1. TG curve of **1** under an air atmosphere (temperature range 30 - 800 °C).

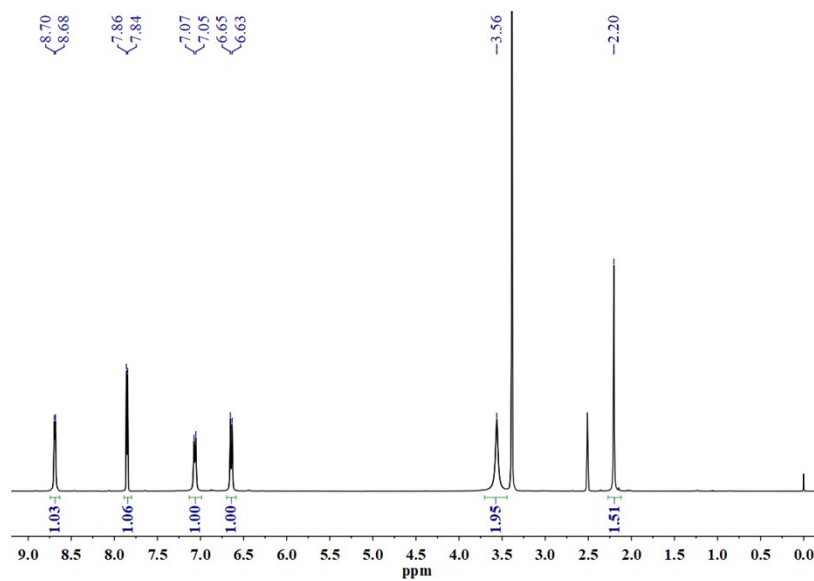

Figure S2. <sup>1</sup>H-NMR spectrum of the completely rehydrated form of **1B** in DMSO-*d*<sub>6</sub>.

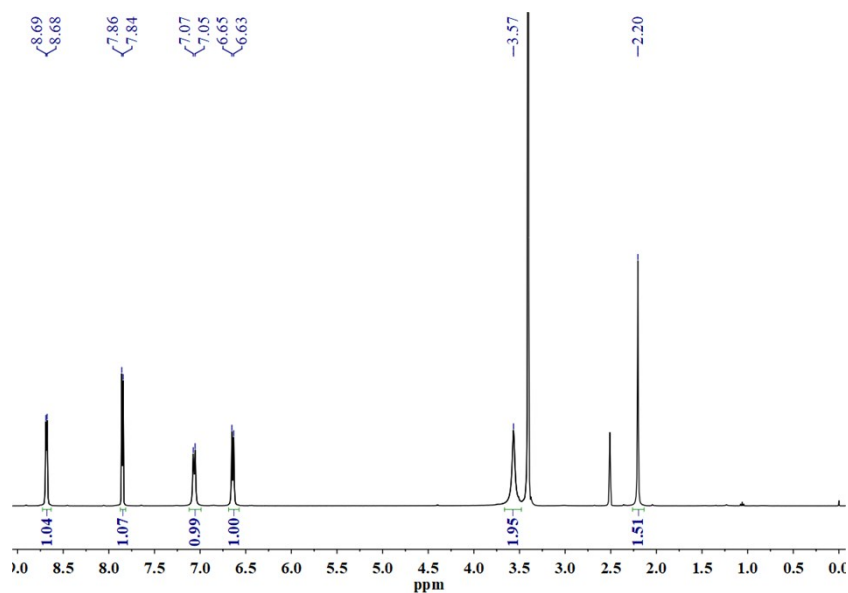

Figure S3. <sup>1</sup>H-NMR spectrum of **1A'** in DMSO-*d*<sub>6</sub>.

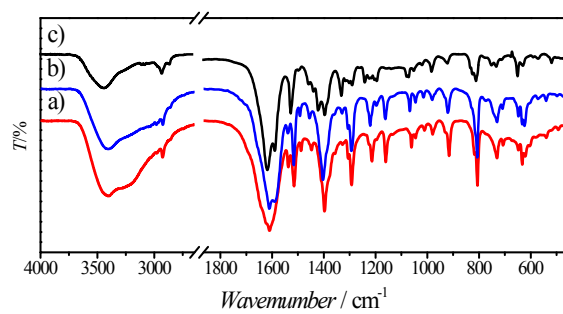

Figure S4. FT-IR spectra of **1** (a), **1A'** (b), and **1B** (c).

Table S1. The absorption peaks of the COO moieties in **1**, **1A'** and **1B**.

| Compound   | $\nu_{\text{as}}(\text{COO})/\text{cm}^{-1}$ | $\nu_{\text{s}}(\text{COO})/\text{cm}^{-1}$ | $\Delta\nu(\text{COO})/\text{cm}^{-1}$ |
|------------|----------------------------------------------|---------------------------------------------|----------------------------------------|
| <b>1</b>   | 1610                                         | 1397                                        | 213                                    |
| <b>1A'</b> | 1611                                         | 1404                                        | 207                                    |
| <b>1B</b>  | 1613                                         | 1417                                        | 196                                    |

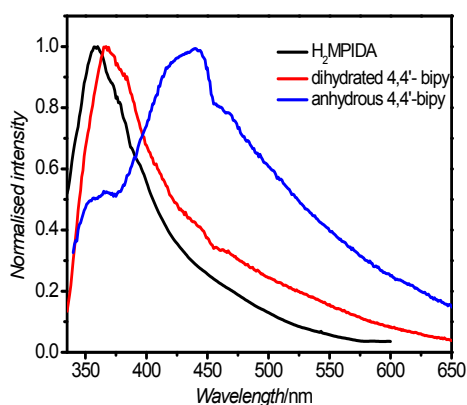

Figure S5. Emission spectra of the ligands H<sub>2</sub>MPIDA, dihydrated 4,4'-bipy and anhydrous 4,4'-bipy upon excitation at 320 nm.

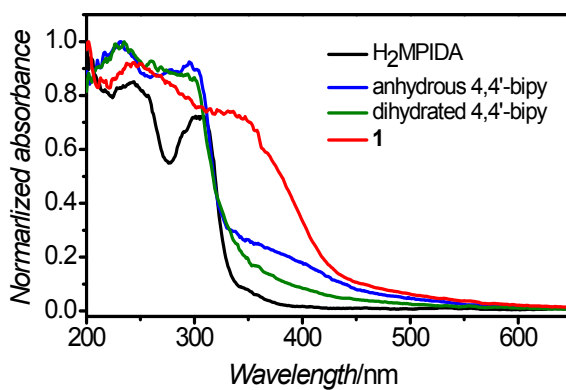

Figure S6. Solid state absorption spectra of **1** and the ligands.

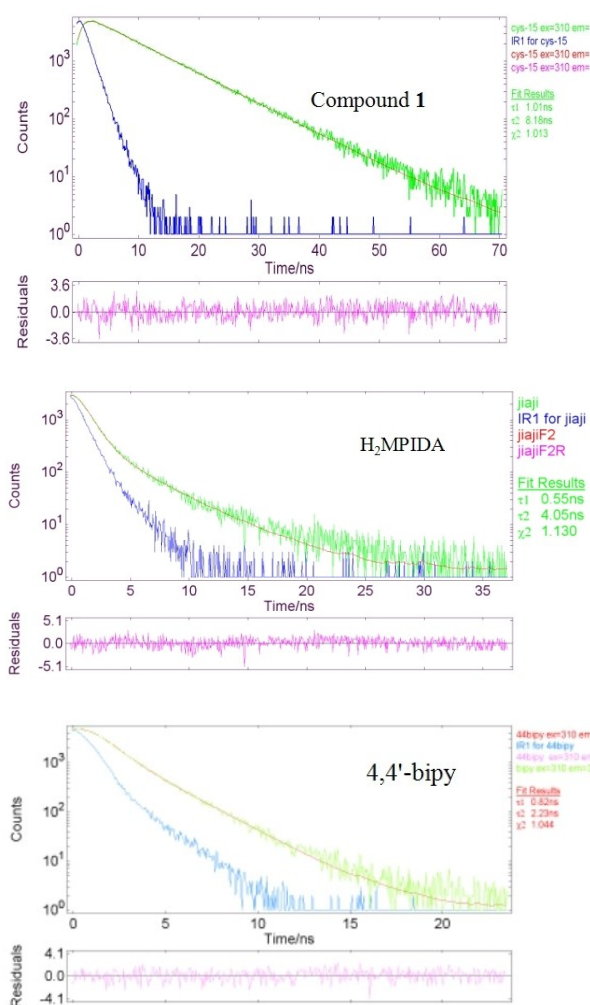

Figure S7. Fluorescence lifetime profiles of **1** and the ligands.

Table S2. Details of the average lifetime analysis of **1** and the ligands.

| compound             | $\lambda_{em}$ (nm) | $\tau_i$ (ns) | $B_i$    | $\tau_{average}$ (ns) | $\tau_{average} = \frac{B_1\tau_1^2 + B_2\tau_2^2}{B_1\tau_1 + B_2\tau_2}$ |
|----------------------|---------------------|---------------|----------|-----------------------|----------------------------------------------------------------------------|
| <b>1</b>             | 567                 | 1.01          | 0.002271 | 7.73                  |                                                                            |
|                      |                     | 8.18          | 0.04194  |                       |                                                                            |
| H <sub>2</sub> MPIDA | 360                 | 0.55          | 0.0949   | 1.09                  |                                                                            |
|                      |                     | 4.05          | 0.002373 |                       |                                                                            |
| 4,4-bipy             | 366                 | 0.82          | 0.054    | 1.32                  |                                                                            |
|                      |                     | 2.23          | 0.011    |                       |                                                                            |

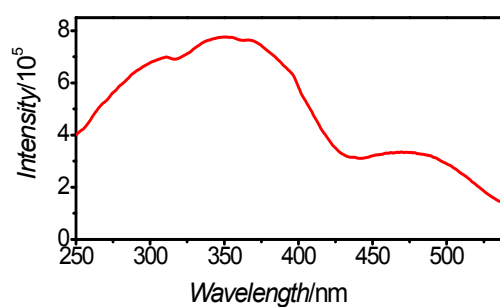

Figure S8. Solid state excitation spectrum of **1** with emission at 567 nm.

Equation S1 and S2. Formation of exciplex.

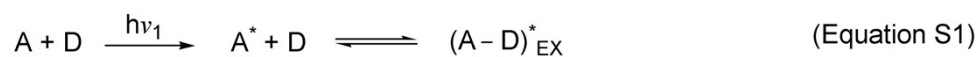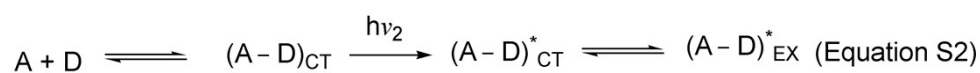

Where A and D are the two moieties to form exciplex, Ex: exciplex, CT: charge transfer.

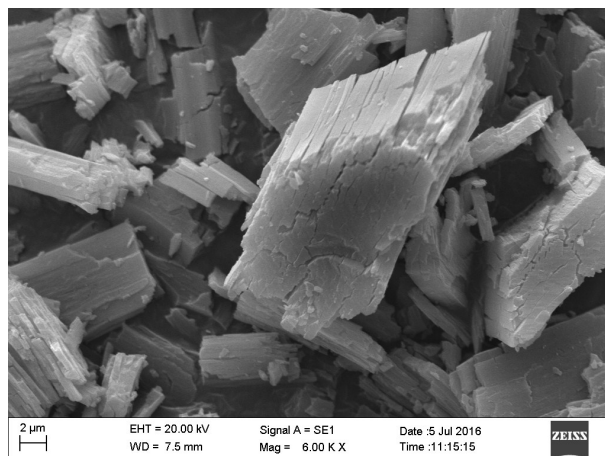

Figure S9. SEM image of **1B**.

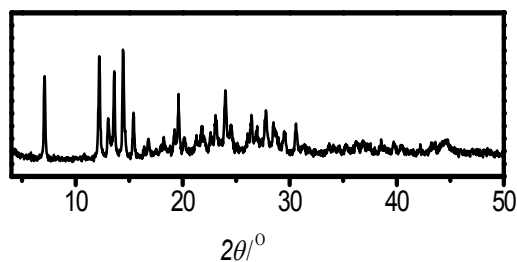

Figure S10. PXRD pattern of **1B-NH<sub>3</sub>**.

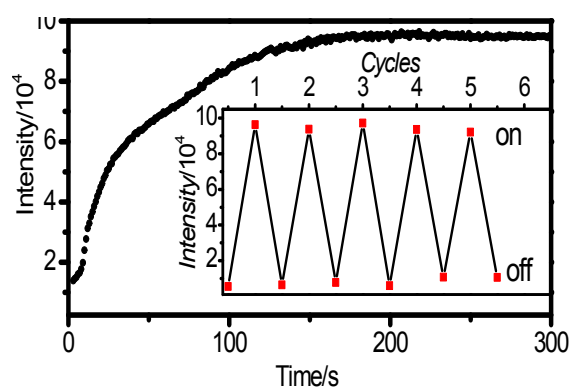

Figure S11. Emission intensity changes of **1B** when exposed to  $\text{NH}_3$  with time and repeated cycles (inset) monitored at 570 nm.

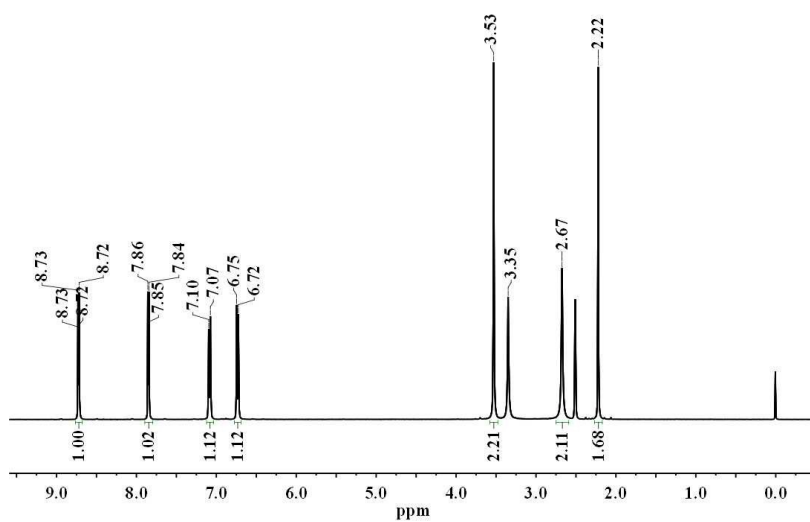

Figure S12.  $^1\text{H}$ -NMR spectrum of **1B-NH<sub>3</sub>** in  $\text{DMSO-}d_6$ .

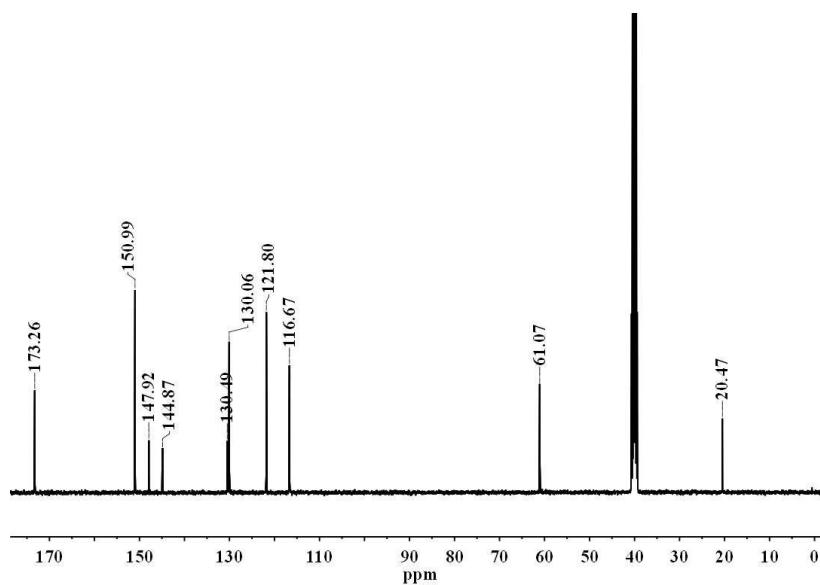

Figure S13.  $^{13}\text{C}$ -NMR spectrum of **1B-NH<sub>3</sub>** in  $\text{DMSO-}d_6$ .



Table S3. Crystal data and refinement parameters for **1**.

|                                               |                                                                                |
|-----------------------------------------------|--------------------------------------------------------------------------------|
| Empirical formula                             | C <sub>32</sub> H <sub>44</sub> N <sub>4</sub> O <sub>15</sub> Zn <sub>2</sub> |
| <i>Mr</i>                                     | 855.450                                                                        |
| crystal System                                | Monoclinic                                                                     |
| space group                                   | <i>C</i> 2/c                                                                   |
| <i>a</i> (Å)                                  | 26.1429(10)                                                                    |
| <i>b</i> (Å)                                  | 7.5779(2)                                                                      |
| <i>c</i> (Å)                                  | 18.5411(7)                                                                     |
| $\alpha$ (°)                                  | 90                                                                             |
| $\beta$ (°)                                   | 97.456(3)                                                                      |
| $\gamma$ (°)                                  | 90                                                                             |
| <i>V</i> (Å <sup>3</sup> )                    | 3642.1(2)                                                                      |
| <i>Z</i>                                      | 4                                                                              |
| <i>T</i> (K)                                  | 291(2)                                                                         |
| <i>D</i> <sub>c</sub> (g · cm <sup>-3</sup> ) | 1.560                                                                          |
| $\mu$ (mm <sup>-1</sup> )                     | 1.393                                                                          |
| <i>F</i> (000)                                | 1776                                                                           |
| $\theta_{\max}$ (°)                           | 26.37                                                                          |
| $\lambda$ (Mo K $\alpha$ )(Å)                 | 0.71073                                                                        |
| tot. data                                     | 11598                                                                          |
| unique data, <i>R</i> <sub>int</sub>          | 3715, 0.0309                                                                   |
| data [ <i>I</i> > 2 $\sigma$ ( <i>I</i> )]    | 2815                                                                           |
| <i>R</i>                                      | 0.0324                                                                         |
| <i>R</i> <sub>w</sub>                         | 0.0708                                                                         |
| <i>s</i>                                      | 1.032                                                                          |
| CCDC number                                   | 822713                                                                         |

Table S4. Selected bond lengths and angles of **1**.

| Bond lengths (Å) |            | Bond angles (°) |           |
|------------------|------------|-----------------|-----------|
| Zn1-O4           | 2.0122(15) | O4-Zn1-O6       | 97.13(7)  |
| Zn1-O6           | 2.0200(16) | O4-Zn1-O2       | 151.76(6) |
| Zn1-O2           | 2.0382(14) | O6-Zn1-O2       | 110.39(7) |
| Zn1-O5           | 2.1373(18) | O4-Zn1-O5       | 90.80(7)  |
| Zn1-N2           | 2.1428(18) | O6-Zn1-O5       | 85.71(8)  |
| Zn1-N1           | 2.4384(18) | O2-Zn1-O5       | 85.24(7)  |
|                  |            | O4-Zn1-N2       | 95.88(7)  |
|                  |            | O6-Zn1-N2       | 89.27(7)  |
|                  |            | O2-Zn1-N2       | 90.82(6)  |
|                  |            | O5-Zn1-N2       | 172.10(7) |
|                  |            | O4-Zn1-N1       | 76.13(6)  |
|                  |            | O6-Zn1-N1       | 171.82(8) |
|                  |            | O2-Zn1-N1       | 75.91(6)  |
|                  |            | O5-Zn1-N1       | 89.72(7)  |
|                  |            | N2-Zn1-N1       | 95.96(7)  |
